# Supplementary material for: Occupational challenges of healthcare workers during the COVID-19 pandemic: a qualitative study
Source: PubMed Central journal article supplement — BMJ Open. 2022 Mar 7;12(3):e054516. doi: 10.1136/bmjopen-2021-054516 (PMC8905413; doi:10.1136/bmjopen-2021-054516), 2022-03-07
Supplement: bmjopen-2021-054516supp002.pdf [file bmjopen-2021-054516supp002.pdf]

## Topic guide: Challenges of health care workers during the COVID-19 pandemic

### Demographic data

- Age
- Gender
- Occupation

### 1. Occupational background

- Could you please tell me about your current work as a medical doctor/qualified nurse/cleaning staff etc?
  - What are your daily tasks? (optional)

### 2. Current workplace situation

- How would you describe your work during the pandemic?
  - How has everyday work changed as a result of the pandemic?
  - Are there any work tasks that you now handle differently? (e.g. do you adapt certain tasks or do you leave something out?)
- In your opinion, what are the main challenges at the moment? (Could you please give examples)
  - How do you handle these challenges?
  - In your opinion, are there any specific challenges for male/female health care workers?
- Do you feel adequately protected at your workplace?
  - Are there colleagues who can protect themselves better or worse against an infection with COVID-19? If so, why is that?
  - How do you define protection, when do you feel adequately protected? (optional)
- How do you feel about the communication (on the ward and with the higher management) during the pandemic?

### 3. Contact and dealing with patients infected with COVID-19

(optional questions for those not working at a COVID-19 ward)

- You had direct contact with a patient infected with COVID-19. How did this contact exactly take place?
  - What steps have you/has the employer taken?

- What was the reaction among your colleagues?
- How did you feel when you realized that you had contact with a patient infected with COVID-19?
- How are you dealing with COVID-19 patients at the moment?
- Which new challenges are you facing with patients infected with COVID-19?
  - Did conflicts arise?
  - How are visits from family members organized?
  - Are there special challenges with seriously ill or dying patients?
  - Are there special challenges due to culture/language?

#### **4. Current health situation**

- Are you part of a risk group?  
If yes:
  - How do you deal with this risk (due to previous illness) while working during the pandemic?
  - How has your employer dealt with this risk (your previous illness) during the pandemic so far?
  - How have your colleagues dealt with this risk during the pandemic so far?
  - In your opinion, what do you think could go better?

#### **5. Social situation**

- How are your family members/relatives/friends dealing with the fact that you are an essential worker during the pandemic?
  - How do you handle care and nursing tasks at home?
  - What kind of support do you have from your employer with regard to care or nursing tasks?
  - Is this a good solution?

#### **6. Coping strategies**

- What are the coping strategies in the team to deal with the situation?
- What are your coping strategies to deal with this situation?
- Do you think that concerns of certain groups are less "heard"? If so, please elaborate
- Is there anything else you would like to discuss or share that we haven't talked about yet?

Thank you very much for taking part in this interview.
